# Supplementary material
Source: PubMed Central journal article supplement (PMC2063468)
Supplement: NIHMS26947-supplement-01.pdf [file NIHMS26947-supplement-01.pdf]

**Table S1, In Situ Hybridization Histochemistry Experiments of Vasopressin pre-mRNA in the Supraoptic Nucleus**

| <b>Manipulation</b>                              | <b>Change in Vasopressin hnRNA Expression From Control</b> | <b>Reference</b>    |
|--------------------------------------------------|------------------------------------------------------------|---------------------|
| <u>Acute salt load</u>                           |                                                            |                     |
| 2 M NaCl/ 0.7-0.8 % body weight i.p.             | 260 % (at 30 minutes post injection)                       | Herman et al 1991   |
| 1.5 M NaCl/1% body weight i.p.                   | ~175 % (at 2 hours post injection)                         | Yue et al 2006      |
| 900 mOsmo/2% body weight i.p.                    | 370 % (at 30 min post injection)                           | Arima et al 1999    |
| 900 mOsmo/2% body weight i.p.                    | ~210 % (at 30 min post injection)                          | Kawasaki et al 2006 |
| <u>Hypotension</u>                               |                                                            |                     |
| Mean arteriol pressure reduced by 60%            | 150 % (at 30 minutes post hemorrhage)                      | Kakiya et al 2000   |
| <u>Chemical messengers</u>                       |                                                            |                     |
| Neuropeptide W-30 injection, ICV                 | 167 % (at 30 minutes post injection)                       | Kawasaki et al 2006 |
| PACAP injection, ICV                             | 186 % (at 30 minutes post injection)                       | Nomura et al 1998   |
| <u>Stress</u>                                    |                                                            |                     |
| Footshock                                        | Reduced to ~65 % at 30 minutes                             | Onaka et al 2003    |
| Nocioceptive stimulation (paraformaldehyde inj.) | ~150% (at 30 minutes post injection)                       | Kurose et al 2001   |

**Table S2, A Partial List of Neuropeptides Suitable for qRT-PCR Analysis Using Intronic Probes**

| <b>Neuropeptide</b>                          | <b>Gene Symbol</b> | <b>Exons</b> | <b>Introns</b> | <b>Species</b>                 |
|----------------------------------------------|--------------------|--------------|----------------|--------------------------------|
| Cholecystokinin                              | CCK                | 3            | 2              | Mouse, rat, human              |
| Cocaine and Amphetamine Regulated Transcript | CART               | 3            | 2              | Mouse, rat, human, cattle      |
| Corticotropin Releasing Hormone              | CRH                | 2            | 1              | Mouse, rat, human              |
| Galanin                                      | GAL                | 6            | 5              | Mouse, rat, human, cattle, dog |
| Hypocretin                                   | HCRT               | 2            | 1              | Mouse, rat, human, cattle, dog |
| Neuropeptide Y                               | NPY                | 4            | 3              | Mouse, rat, zebrafish, human   |
| Oxytocin                                     | OXT                | 3            | 2              | Mouse, rat, human, cattle      |
| Prodynorphin                                 | PDYN               | 4 (3)        | 3 (2)          | Mouse, human, (rat)            |
| Somatostatin                                 | SST                | 2            | 1              | Mouse, rat, human, cattle, dog |
| Tachykinin, precursor 1                      | TAC1               | 7 (5-7)      | 6 (4-6)        | Mouse, rat, cattle, (human)    |
| Vasoactive Intestinal Peptide                | VIP                | 7            | 6              | Mouse, rat                     |
| Vasopressin                                  | AVP                | 3            | 2              | Mouse, rat, human, cattle, dog |

Note: Some exons can be untranslated.
